# Supplementary material for: Expression of Ca2+-permeable two-pore channels rescues NAADP signalling in TPC-deficient cells
Source: PubMed Central journal article supplement (PMC4516428; doi:10.15252/embj.201490009), 2015-04-14
Supplement: embj0034-1743-sd2.pdf [file embj0034-1743-sd2.pdf]

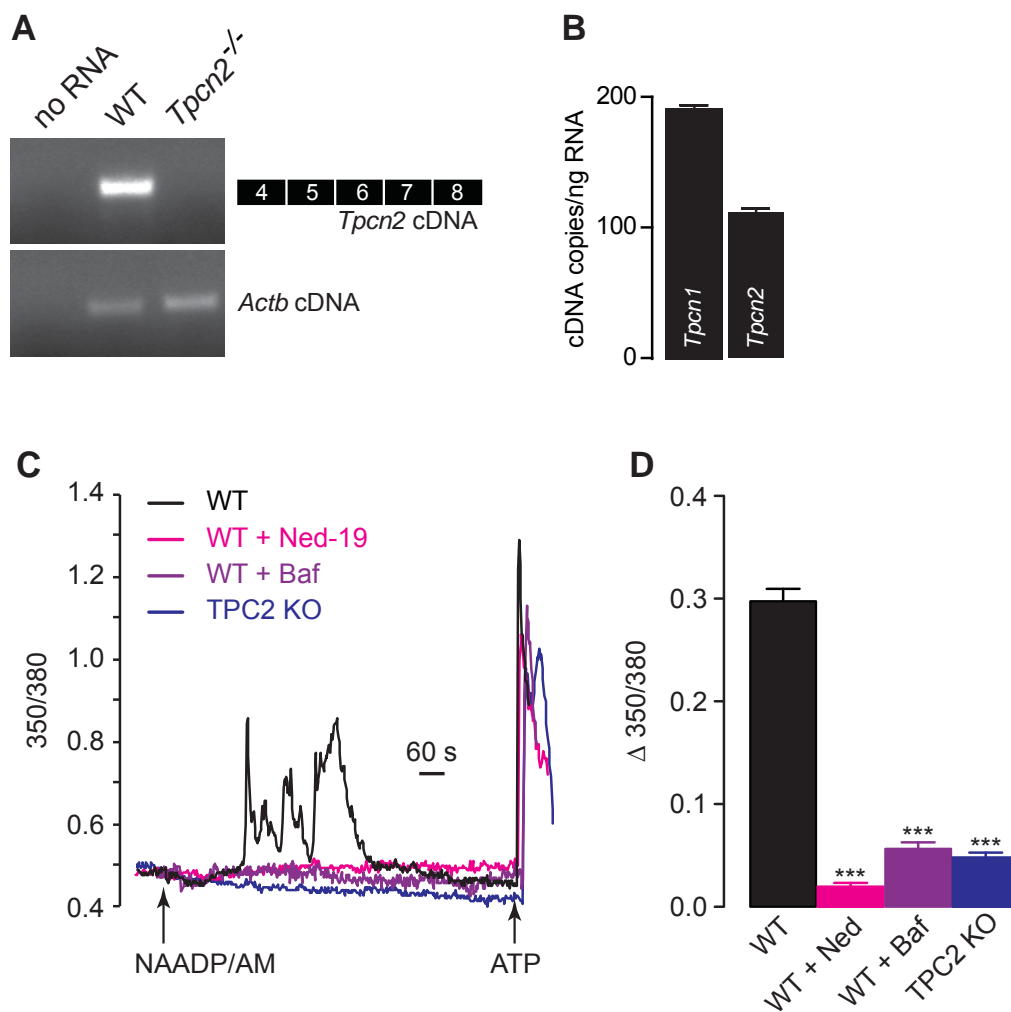

**Figure S2. Macrophages from *Tpcn2*<sup>-/-</sup> animals fail to respond to NAADP.**

- A** RT-PCR analysis of *Tpcn2* expression in bone marrow-derived macrophages from wild-type (WT) and *Tpcn2*<sup>-/-</sup> animals. Amplified cDNA corresponds to the exonic sequences shown in black. Expression of *Actb* was used as a control. Primers used for one-step RT-PCR were the same as in Figure 1.
- B** RT-qPCR analysis of absolute levels of *Tpcn1* and *Tpcn2* transcripts in WT macrophages. *Tpcn1*/*Tpcn2* ratio of expression correspond to 1.7; n = 6.
- C** Representative single-cell Ca<sup>2+</sup> traces showing 350/380 ratios of fura-2 fluorescence upon addition of 5  $\mu$ M extracellular NAADP/AM in wild-type (WT) and *Tpcn2*<sup>-/-</sup> (TPC2 KO) bone marrow-derived macrophages. NAADP/AM-induced Ca<sup>2+</sup> responses were blocked in WT cells by pre-incubation with 10  $\mu$ M *trans*-Ned-19 (Ned-19; 45 min) and 1  $\mu$ M bafilomycin A1 (Baf; 45 min).
- D** Maximum Ca<sup>2+</sup> changes derived from single-cell Ca<sup>2+</sup> traces (as in C); n = 88–339 cells; p < 0.0001 (\*\*\*) relative to WT cells using the ANOVA-Tukey test.
