# Supplementary material for: Expression of Ca2+-permeable two-pore channels rescues NAADP signalling in TPC-deficient cells
Source: PubMed Central journal article supplement (PMC4516428; doi:10.15252/embj.201490009), 2015-04-14
Supplement: embj0034-1743-sd3.pdf [file embj0034-1743-sd3.pdf]

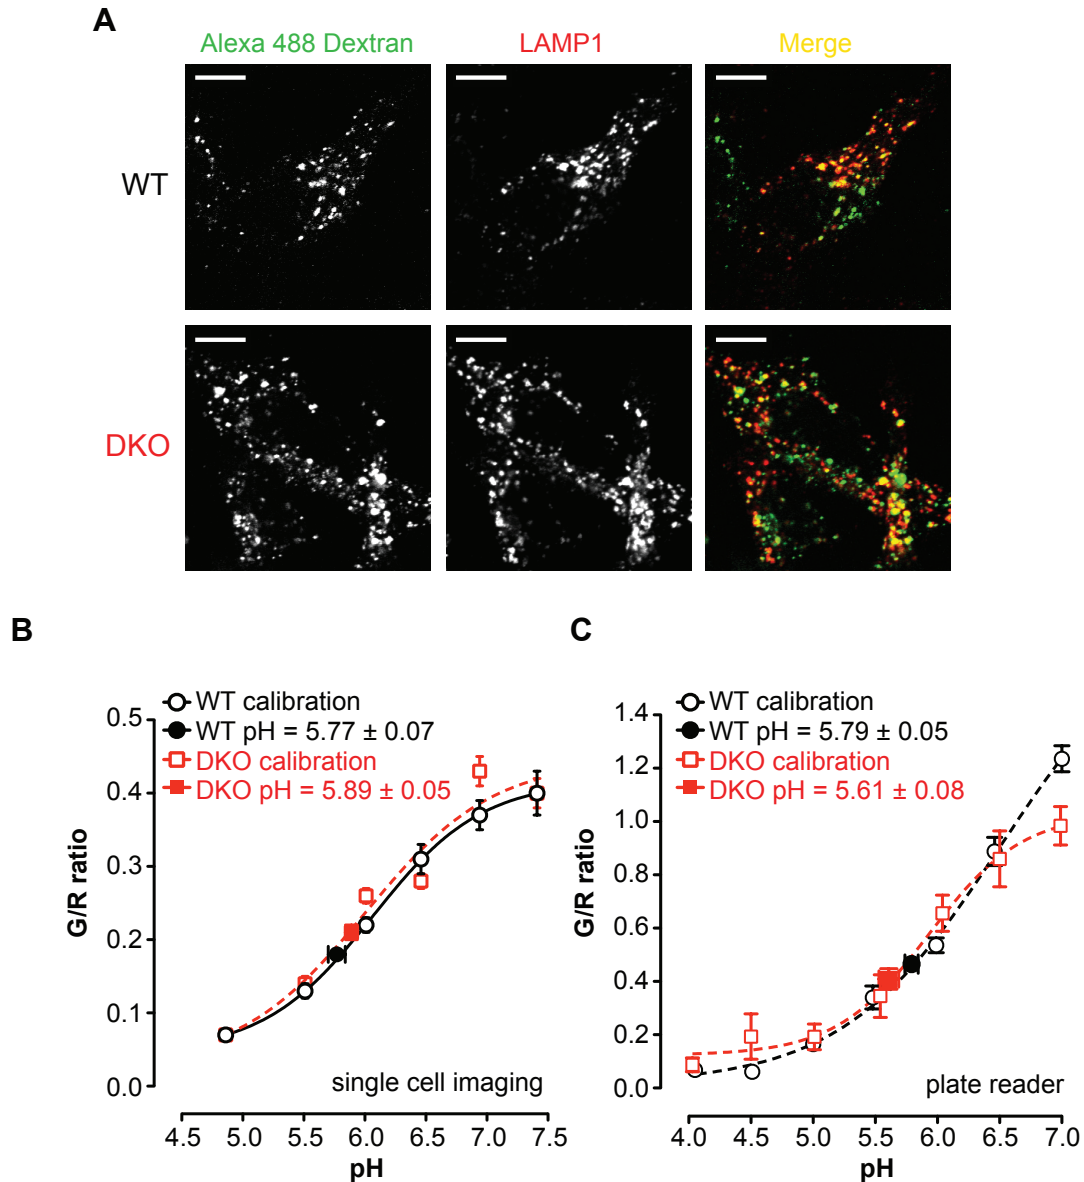

**Figure S3. Determination of  $pH_L$  in endo-lysosomes of WT and DKO MEFs.**

**A** Following loading of endo-lysosomes with a fixable Alexa 488-dextran, MEFs were fixed and immuno-labelled with an anti-LAMP1 antibody (clone 1D4B, DSHB) to confirm trafficking of the dextran to the lysosomes (as indicated by dextran co-localisation with LAMP1).

**B,C** MEF endo-lysosomes were loaded by endocytosis with fluorescein-dextran (pH-sensitive) and texas red-dextran (pH-insensitive) as in (A) and the fluorescence collected for single cell measurements using a confocal microscope (B) or for population analysis using a plate reader (C). Calibration curves, were obtained as described in Material and Methods. There was no significant difference between the  $pH_L$  in endo-lysosomes of wild-type (WT) and *Tpcn1/2<sup>-/-</sup>* (DKO) MEFs. Data are presented as the mean  $\pm$  SEM: in (B)  $n = 105$  cells (WT & DKO) and in (C)  $n = 16$  (WT) and 12 (DKO).
