# Supplementary material for: Expression of Ca2+-permeable two-pore channels rescues NAADP signalling in TPC-deficient cells
Source: PubMed Central journal article supplement (PMC4516428; doi:10.15252/embj.201490009), 2015-04-14
Supplement: embj0034-1743-sd4.pdf [file embj0034-1743-sd4.pdf]

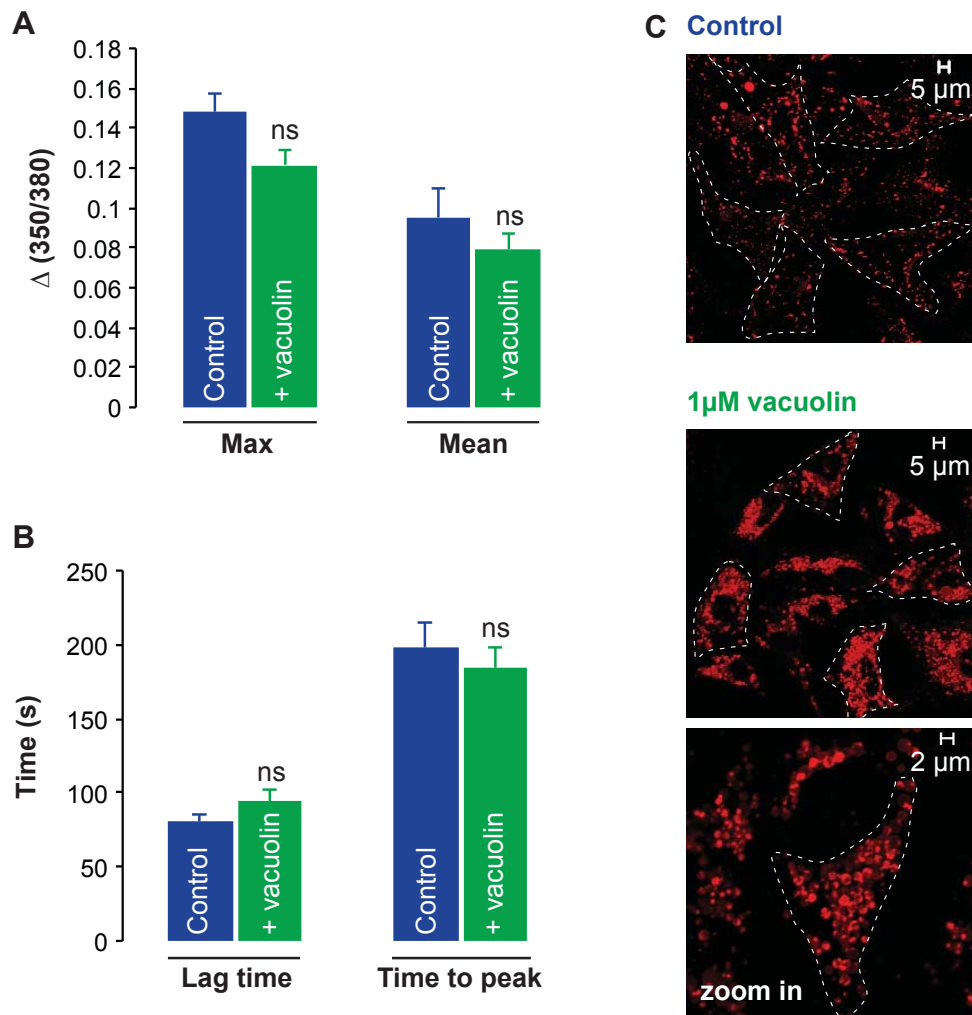

**Figure S4. Vacuolin-induced enlargement of lysosomes has no significant effect on NAADP-induced  $\text{Ca}^{2+}$  release.**

**A-C** WT MEFs were either treated with vacuolin-1 (1  $\mu\text{M}$  for 4 h) or were left untreated (Control) and fura-2  $\text{Ca}^{2+}$  signals measured after addition of 10  $\mu\text{M}$  NAADP/AM in  $\text{Ca}^{2+}$ -containing medium. Vacuolin-induced enlargement of lysosomes had no significant effect on NAADP-induced  $\text{Ca}^{2+}$  release, neither in terms of amplitudes nor kinetics.

**A,B** (A) Maximum  $\text{Ca}^{2+}$  amplitude and the mean  $\text{Ca}^{2+}$  response over a 10-min period post-addition of NAADP/AM. (B) Lag time (delay between NAADP/AM addition and commencement of the  $\text{Ca}^{2+}$  response) and the time to peak (time period from first  $\text{Ca}^{2+}$  increase to maximum  $\text{Ca}^{2+}$  peak).  $n = 102-105$ ; ns,  $p > 0.05$  (ns) relative to control using the ANOVA-Tukey test.

**C** Enlargement of lysosomes was confirmed by LysoTracker-Red DND99 staining (100 nM for 3 min) in WT MEFs.
