# Supplementary material for: Expression of Ca2+-permeable two-pore channels rescues NAADP signalling in TPC-deficient cells
Source: PubMed Central journal article supplement (PMC4516428; doi:10.15252/embj.201490009), 2015-04-14
Supplement: embj0034-1743-sd5.pdf [file embj0034-1743-sd5.pdf]

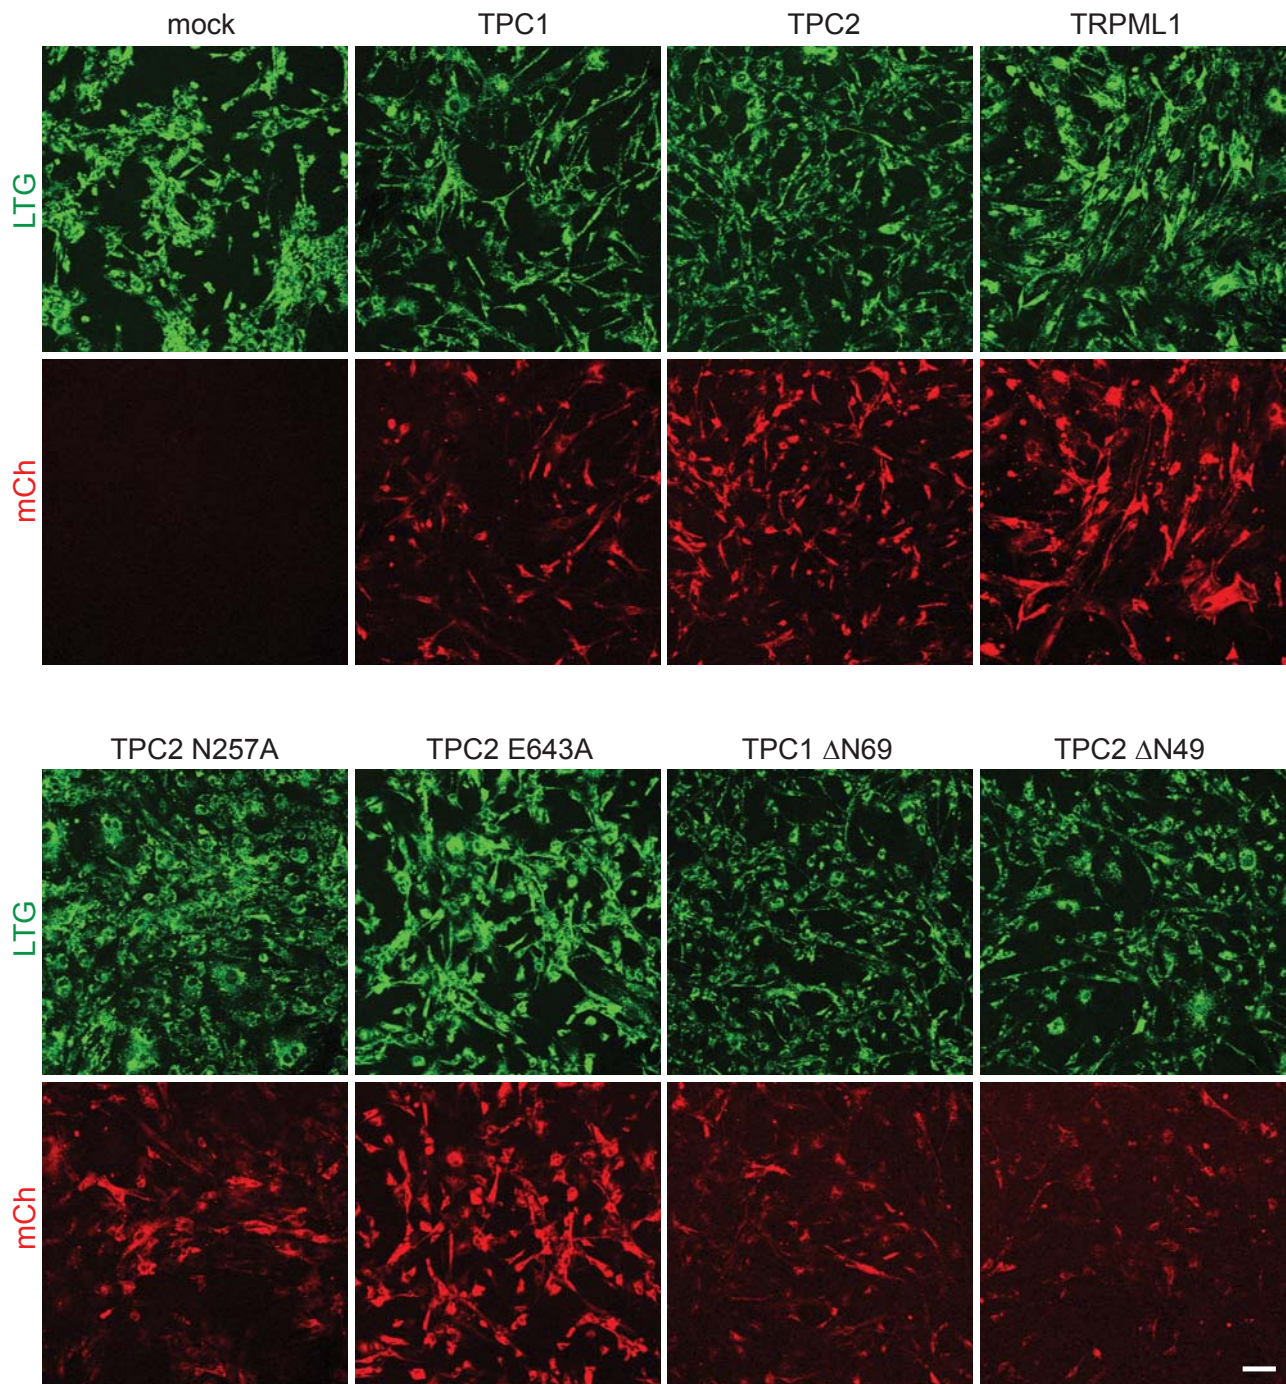

**Figure S5. Imaging of C-terminal mCherry-tagged TPC proteins in MEFs.**

Live-cell imaging of *Tpcn1/2*<sup>-/-</sup> MEF cells expressing mCherry-tagged proteins (LTG – LysoTracker Green signal; mCh – mCherry signal). Scale bar denotes 100  $\mu$ m.

Each image is a copy of Figures 5C, 6C and 7C, but here, they have been subjected to unequal *post hoc* digital manipulation of the mCherry signal intensity to better visualize the signal in lower expressing cells.
