# Supplementary material for: Expression of Ca2+-permeable two-pore channels rescues NAADP signalling in TPC-deficient cells
Source: PubMed Central journal article supplement (PMC4516428; doi:10.15252/embj.201490009), 2015-04-14
Supplement: embj0034-1743-sd6.pdf [file embj0034-1743-sd6.pdf]

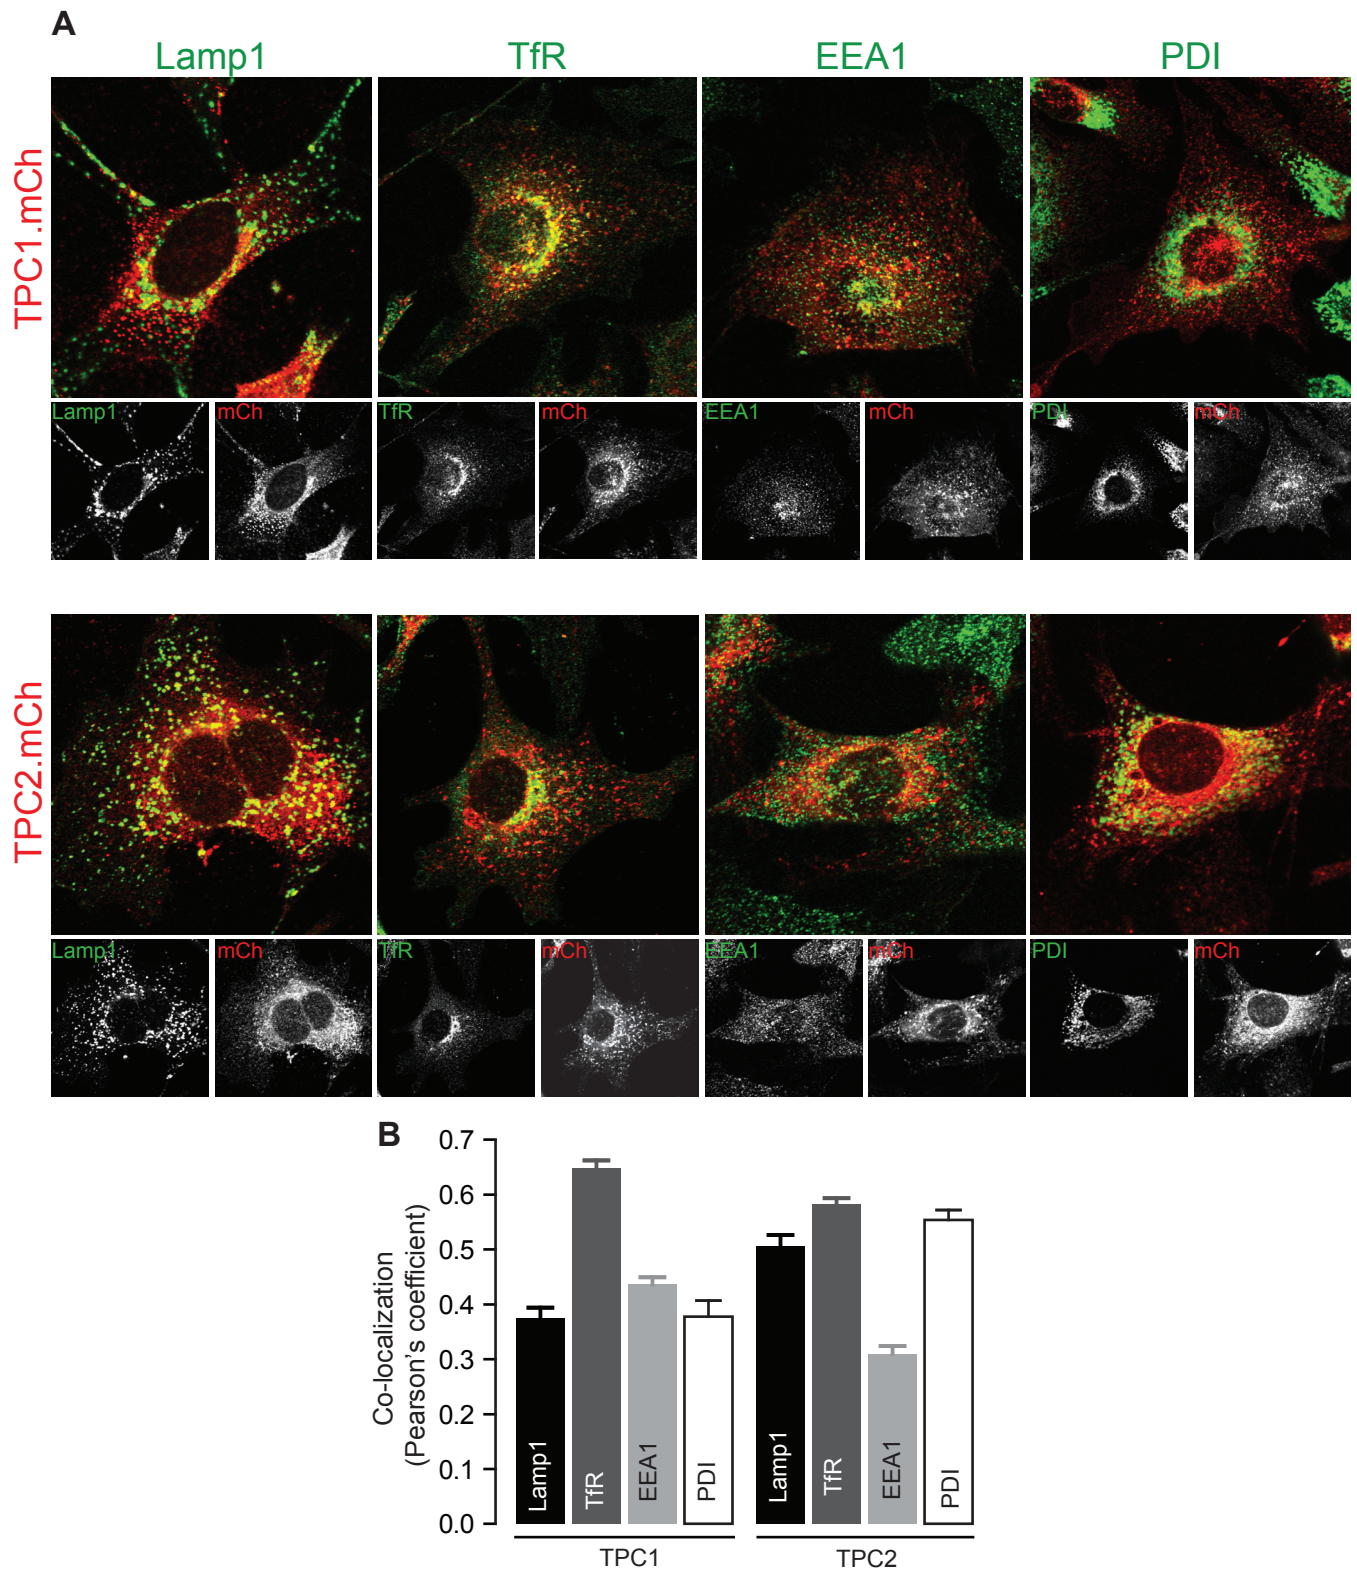

**Figure S6. Co-localization of TPCs with organelle-marker proteins.**

**A** *Tpcn1/2<sup>-/-</sup>* MEFs expressing mCherry-tagged TPC1 or TPC2 were immunostained with antibodies against RFP (red signal) and organelle-marker proteins (Lamp1: late endosomes/lysosomes; TfR: recycling endosomes; EEA1: early endosomes; PDI: endoplasmic reticulum; green signal). Representative images correspond to cells with a co-localization value close to the mean value for its group (B).

**B** Pearson's co-localization coefficient was calculated for individual cells ( $n = 26 - 32$ ). Values represent mean  $\pm$  SEM.

Despite the partial ER retention of TPC2.mCh in *Tpcn1/2<sup>-/-</sup>* MEFs, the  $\text{Ca}^{2+}$  signals evoked by NAADP in these cells retain the expected acidic  $\text{Ca}^{2+}$  store pharmacology (Fig 5G).
