# Supplementary material for: Expression of Ca2+-permeable two-pore channels rescues NAADP signalling in TPC-deficient cells
Source: PubMed Central journal article supplement (PMC4516428; doi:10.15252/embj.201490009), 2015-04-14
Supplement: embj0034-1743-sd7.pdf [file embj0034-1743-sd7.pdf]

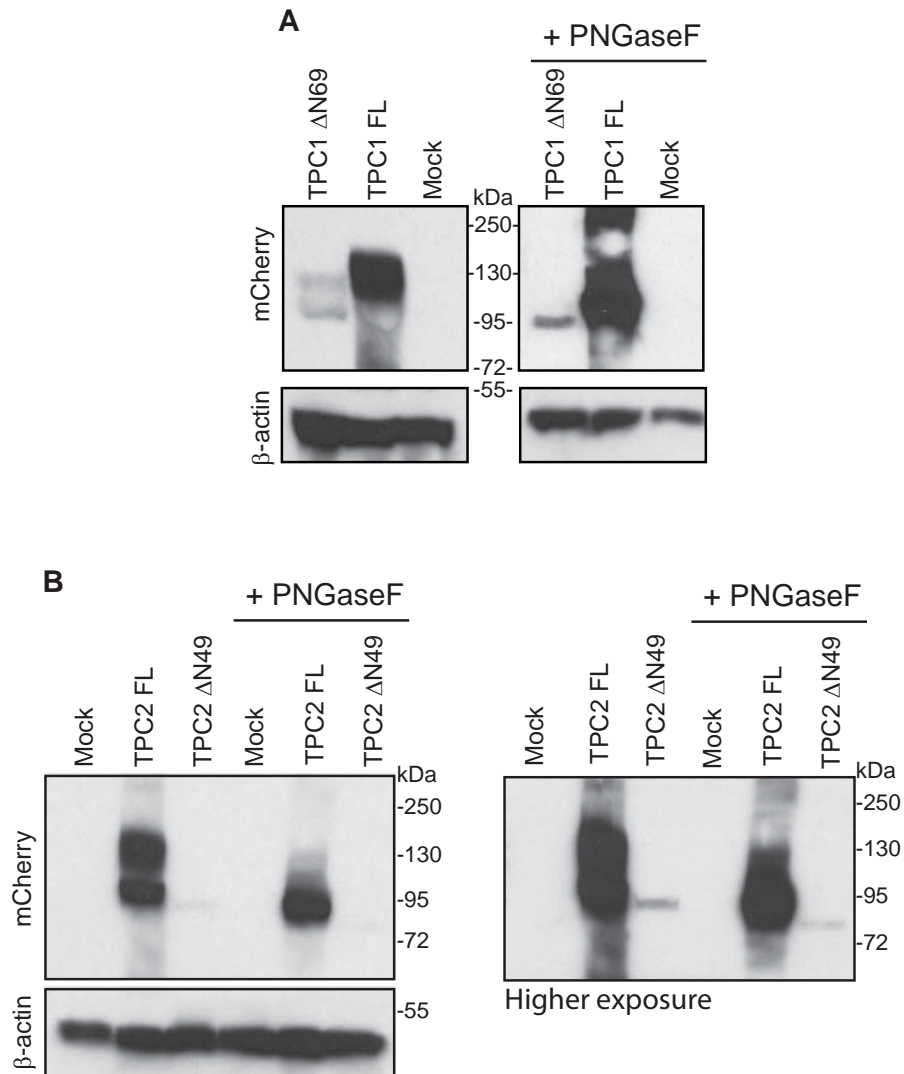

**Figure S7. Glycosylation status of N-terminally truncated TPCs.**

**A, B** Immunoblotting analysis of *Tpcn1/2<sup>-/-</sup>* (DKO) MEFs expressing mCherry-tagged mouse TPC1 (A) or TPC2 (B), full length (FL) and N-terminal truncations ( $\Delta$ N). Blot was probed for mCherry and for  $\beta$ -actin as a loading control. Where indicated, lysates were subjected to PNGase F digestion as described in methods. Compared to the equivalent full-length proteins, the N-terminal truncated forms show lower levels of expression and proportionally lower levels of heavily glycosylated forms; note that only the core-glycosylated form of TPC2- $\Delta$ N49 is detected.
