# Supplementary material for: Expression of Ca2+-permeable two-pore channels rescues NAADP signalling in TPC-deficient cells
Source: PubMed Central journal article supplement (PMC4516428; doi:10.15252/embj.201490009), 2015-04-14

Figure 6B

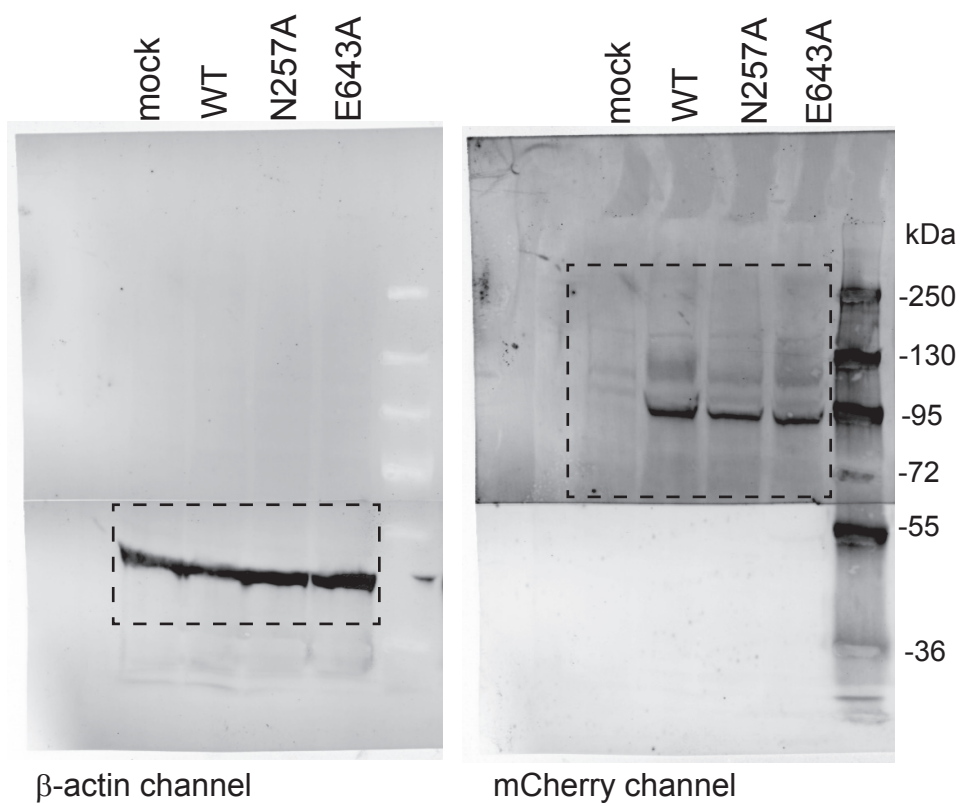

Supplement: embj0034-1743-sd16.pdf [file embj0034-1743-sd16.pdf]
